# Supplementary material for: Effect of Simultaneous High-definition Transcranial Direct Current Stimulation and Robot-assisted Gait Training on Gait Function in Chronic Stroke Patients
Source: Research Square preprint supplement (doi:10.21203/rs.3.rs-1965903/v1), 2022-08-24
Supplement: Supplementary file 1 [file 6c6a137295e138452e5a2342.docx]

Supplementary Table 1. Changes in gait and physical function after robot-assisted gait training with high-definition transcranial direct current stimulation analyzed using Wilcoxon signed rank test.

|  | RAGT rHD-tDCS | | |  | RAGT sHD-tDCS | | |
| --- | --- | --- | --- | --- | --- | --- | --- |
| Pre | Post | F/U |  | Pre | Post | F/U |
| 10MWT (*m/s*) | 0.48 (0.22) | 0.52 (0.24)** | 0.52 (0.25)** |  | 0.53 (0.38) | 0.57 (0.43)* | 0.54 (0.39) |
| TUG (*s*) | 29.87 (23.82) | 27.92 (24.77)* | 27.14 (25.21)** |  | 24.16 (11.28) | 21.84 (9.68)* | 21.52 (9.28)* |
| FAC | 3.42 (0.67) | 3.50 (0.52) | 3.58 (0.67) |  | 3.17 (0.72) | 3.42 (0.90) | 3.42 (0.90) |
| FRT (*cm*) | 17.99 (7.57) | 19.58 (7.28)* | 19.52 (7.93)* |  | 18.23 (6.99) | 19.10 (7.12) | 19.43 (7.43) |
| BBS | 26.08 (8.92) | 28.83 (9.78)** | 29.75 (11.21)**, |  | 27.75 (8.40) | 29.17 (8.81)* | 28.83 (8.92) |
| DGI | 7.83 (2.62) | 9.33 (3.20)** | 9.25 (4.11)* |  | 7.17 (3.35) | 7.58 (3.42) | 7.33 (3.50) |
| FMA−LE | 17.83 (3.97) | 19.25 (3.70)* | 18.42 (4.08) |  | 18.58 (4.58) | 18.75 (4.35) | 18.58 (4.19) |
| FMA−TOTAL | 52.50 (16.20) | 54.50 (16.27)* | 53.75 (16.43) |  | 52.33 (22.03) | 52.25 (22.00) | 52.17 (21.29) |
| K-MBI | 84.67 (6.81) | 85.17 (6.66) | 85.75 (7.02) |  | 82.17 (11.54) | 82.17 (11.54) | 82.17 (11.54) |

Continuous values are presented as mean (standard deviation).
RAGT rHD-tDCS, Robot-assisted Gait Training with Real High-definition Transcranial Direct Current Stimulation Group; RAGT sHD-tDCS, Robot-assisted Gait Training with Sham High-definition Transcranial Direct Current Stimulation Group; Pre, Pre-intervention; Post, Post-intervention; F/U, 1 Month Follow-up; 10MWT; 10 Meter Walk Test; TUG, Timed Up and Go; FAC, Functional Ambulation Category; FRT, Functional Reach Test; BBS, Berg Balance Scale; DGI, Dynamic Gait Index; FMA, Fugl-Meyer Assessment; LE, Lower Extremity; K-MBI, Korean Version of the Modified Barthel Index.
*Significant change compared with Pre (*P* < 0.05), **Significant change compared with Pre (*P* < 0.01).

Supplementary Table 2. Time × group interactions and changes in gait and physical function after robot-assisted gait training with high-definition transcranial direct current stimulation analyzed using Bonferroni’s post hoc analysis of the repeated measures analysis of variance.

|  | RAGT rHD-tDCS | | |  | RAGT sHD-tDCS | | |  | Time × group  measures | |
| --- | --- | --- | --- | --- | --- | --- | --- | --- | --- | --- |
| Pre | Post | F/U |  | Pre | Post | F/U |  | F | *P* |
| 10MWT (*m/s*) | 0.48 (0.22) | 0.52 (0.24)* | 0.52 (0.25)* |  | 0.53 (0.38) | 0.57 (0.43) | 0.54 (0.39) |  | 1.229 | 0.303 |
| TUG (*s*) | 29.87 (23.82) | 27.92 (24.77)** | 27.14 (25.21)** |  | 24.16 (11.28) | 21.84 (9.68) | 21.52 (9.28) |  | 0.071 | 0.931 |
| FAC | 3.42 (0.67) | 3.50 (0.52) | 3.58 (0.67) |  | 3.17 (0.72) | 3.42 (0.90) | 3.42 (0.90) |  | 1.453 | 0.245 |
| FRT (*cm*) | 17.99 (7.57) | 19.58 (7.28)* | 19.52 (7.93)* |  | 18.23 (6.99) | 19.10 (7.12) | 19.43 (7.43) |  | 0.496 | 0.613 |
| BBS | 26.08 (8.92) | 28.83 (9.78)** | 29.75 (11.21)** |  | 27.75 (8.40) | 29.17 (8.81) | 28.83 (8.92) |  | 3.095 | 0.066 |
| DGI | 7.83 (2.62) | 9.33 (3.20)** | 9.25 (4.11) |  | 7.17 (3.35) | 7.58 (3.42) | 7.33 (3.50) |  | 2.858 | 0.068 |
| FMA−LE | 17.83 (3.97) | 19.25 (3.70)* | 18.42 (4.08) |  | 18.58 (4.58) | 18.75 (4.35) | 18.58 (4.19) |  | 2.482 | 0.095 |
| FMA−TOTAL | 52.50 (16.20) | 54.50 (16.27)* | 53.75 (16.43) |  | 52.33 (22.03) | 52.25 (22.00) | 52.17 (21.29) |  | 4.199 | 0.029† |
| K-MBI | 84.67 (6.81) | 85.17 (6.66) | 85.75 (7.02) |  | 82.17 (11.54) | 82.17 (11.54) | 82.17 (11.54) |  | 3.591 | 0.036† |

Continuous values are presented as mean (standard deviation).
RAGT rHD-tDCS, Robot-assisted Gait Training with Real High-definition Transcranial Direct Current Stimulation Group; RAGT sHD-tDCS, Robot-assisted Gait Training with Sham High-definition Transcranial Direct Current Stimulation Group; Pre, Pre-intervention; Post, Post-intervention; F/U, 1 Month Follow-up; 10MWT; 10 Meter Walk Test; TUG, Timed Up and Go; FAC, Functional Ambulation Category; FRT, Functional Reach Test; BBS, Berg Balance Scale; DGI, Dynamic Gait Index; FMA, Fugl-Meyer Assessment; LE, Lower Extremity; K-MBI, Korean Version of the Modified Barthel Index.
*Significant change compared with Pre (*P* < 0.05), **Significant change compared with Pre (*P* < 0.01), †Significant (*P* < 0.05) interaction effects (time × group).

Supplementary Table 3. Stroke lesions in subjects

| Patient number | Group | Gait speed | Stroke lesion |
| --- | --- | --- | --- |
| 1 | RAGT rHD-tDCS | SS | Rt. thalamic ICH/IVH |
| 2 | RAGT sHD-tDCS | SS | Lt. MCA infarction |
| 3 | RAGT rHD-tDCS | FS | Lt. thalamic ICH/IVH |
| 4 | RAGT sHD-tDCS | FS | Lt. ACA, MCA infarction |
| 5 | RAGT rHD-tDCS | FS | Lt. pons infarction |
| 6 | RAGT rHD-tDCS | FS | Lt. pons infarction |
| 7 | RAGT sHD-tDCS | FS | Rt. MCA infarction |
| 8 | RAGT rHD-tDCS | SS | Lt. BG ICH |
| 9 | RAGT rHD-tDCS | SS | Lt. thalamic ICH/IVH |
| 10 | RAGT sHD-tDCS | SS | Rt. CR infarction |
| 11 | RAGT sHD-tDCS | FS | Lt. pons infarction |
| 12 | RAGT sHD-tDCS | SS | Rt. BG ICH |
| 13 | RAGT sHD-tDCS | SS | Lt. BG ICH |
| 14 | RAGT rHD-tDCS | FS | Rt. BG infarction |
| 15 | RAGT rHD-tDCS | FS | Rt. CR infarction |
| 16 | RAGT rHD-tDCS | FS | Rt. BG and CR infarction |
| 17 | RAGT sHD-tDCS | SS | Rt. MCA infarction |
| 18 | RAGT sHD-tDCS | FS | Lt. BG ICH |
| 19 | RAGT rHD-tDCS | SS | Rt. thalamic infarction |
| 20 | RAGT sHD-tDCS | SS | Lt. MCA infarction |
| 21 | RAGT sHD-tDCS | FS | Lt. pons infarction |
| 22 | RAGT rHD-tDCS | SS | Lt. BG ICH |
| 23 | RAGT rHD-tDCS | FS | Rt. thalamic infarction |
| 24 | RAGT sHD-tDCS | SS | Lt. BG and CR infarction |

RAGT rHD-tDCS, Robot-assisted Gait Training with Real High-definition Transcranial Direct Current Stimulation Group; RAGT sHD-tDCS, Robot-assisted Gait Training with Sham High-definition Transcranial Direct Current Stimulation Group; FS, Fast Speed; SS, Slow Speed; ICH, Intracerebral Hemorrhage; IVH, Intraventricular Hemorrhage; MCA, Middle Cerebral Artery; ACA, Anterior Cerebral Artery; BG, Basal Ganglia; CR, Corona Radiata.
